# Supplementary material for: The Importance of Population Growth and Regulation in Human Life History Evolution
Source: PubMed Central journal article supplement (PMC4382128; doi:10.1371/journal.pone.0119789), 2015-04-01
Supplement: pone.0119789.s001.pdf [file pone.0119789.s001.pdf]

# Supplementary to “The importance of population growth and regulation in human life history evolution”

Ryan Baldini\*

February 4, 2015

## Methods for exploring parameter space

The size of the parameter space precludes exhaustive exploration in this paper. I conducted a restricted search by varying only two parameters at a time, leaving the remaining parameters fixed at baseline values. This allows for identification of first-order interactions between parameters with respect to their effect on  $\hat{t}$  and  $\hat{\lambda}$ . For each interaction (e.g.  $\alpha$  and  $\beta$ ), 100 values were uniformly selected from the range of both variables, producing a 100x100 matrix and therefore 10,000 separate model equilibria. Equilibria were numerically calculated using the rootSolve package in R.

Baseline values were  $\alpha = 0.1$ ,  $\beta = 0.2$ ,  $\mu_0 = 0$ ,  $\gamma = 5$ , and  $\epsilon = \theta = g = 0$ . The parameters  $\alpha$  and  $\beta$  were varied by plus and minus an order of magnitude (e.g. 0.01 to 1 for  $\alpha$ ). The remaining parameters involved exponential functions, so were varied over a smaller, additive range.  $\gamma$  ranged from 1 to 10;  $\epsilon$  and  $\theta$  ranged from -5 to 5; and  $g$  ranged from 0 to 1. Since variation in  $\mu_0$  has the same effect as variation in  $\theta$ ,  $\mu_0$  was not varied.

For model case 1 or 3, I discarded results for any parameter set where  $r$  or  $\hat{N}$  was calculated to be less than 0, respectively. The condition was identical across the two cases, so the same results again apply to both. For model case 2, I discarded results for which  $\hat{N} < 0$  or  $\hat{N} = \infty$ . The latter is equivalent to the condition that  $g > \mu$ , which was assumed to not hold in the text, for the same reason. The range of parameter values I used usually surpassed these limits, indicating that the parameter space was well-explored for first-order interactions

---

\*Department of Anthropology, Stanford University, Stanford, CA 94305. ryanbaldini@gmail.com
